# Supplementary material
Source: PubMed Central journal article supplement (PMC3992191)

Supplementary Table 1: Data that could be extracted from narratives of 973 waitlist candidates with approved HPS exceptions

| Available clinical data                                                   | Number with data, (%) |
|---------------------------------------------------------------------------|-----------------------|
| Transthoracic echocardiogram (TTE)                                        | 833 (85.6)            |
| Definitive shunt on TTE                                                   | 815 (97.8)            |
| Definitive intrapulmonary shunt on TTE                                    | 461 (56.6)            |
| Timing of bubbles reported as “late” when shunt when definitively present | 112 (13.7)            |
| Macro-aggregated albumin (MAA) scan performed                             | 223 (23.7)            |
| MAA shunt fraction reported                                               | 114 (51.1)            |
| Pulmonary function test data                                              | 165 (17.0)            |
| Presence or absence of concomitant pulmonary disease                      | 973 (100.0)           |
| Need for supplemental oxygen                                              | 384 (39.5)            |
| Arterial blood gas (ABG)                                                  | 855 (87.8)            |
| ABG on room-air                                                           | 747 (87.4)            |

Supplementary Table 2: Pre-liver transplant HPS waitlist candidates dying on the waitlist or within 90 days of de-listing for waitlist candidates with HPS MELD exceptions\*

| PaO <sub>2</sub> category | Deaths on the waitlist or within 90 days of delisting, (%) |
|---------------------------|------------------------------------------------------------|
| ≤44.0mmHg, N=94           | 9 (9.6)                                                    |
| 44.1-54.0mmHg, N=344      | 30 (8.7)                                                   |
| 54.1-61.0mmHg, N=364      | 32 (8.8)                                                   |
| ≥61.1mmHg, N=84           | 6 (7.1)                                                    |
| Can't determine, N=87     | 9 (10.3)                                                   |

\* PaO<sub>2</sub> categories based on best-fit cubic spline PaO<sub>2</sub> cutpoints. "Can't determine" patients are those without room-air oxygenation data. P=0.96 for chi-square test comparing the proportion dying on the waitlist or within 90 days of de-listing.

Supplementary Figure 1: Flow diagram of inclusion of liver transplant waitlist candidates submitting an HPS exception application from 2002-2012

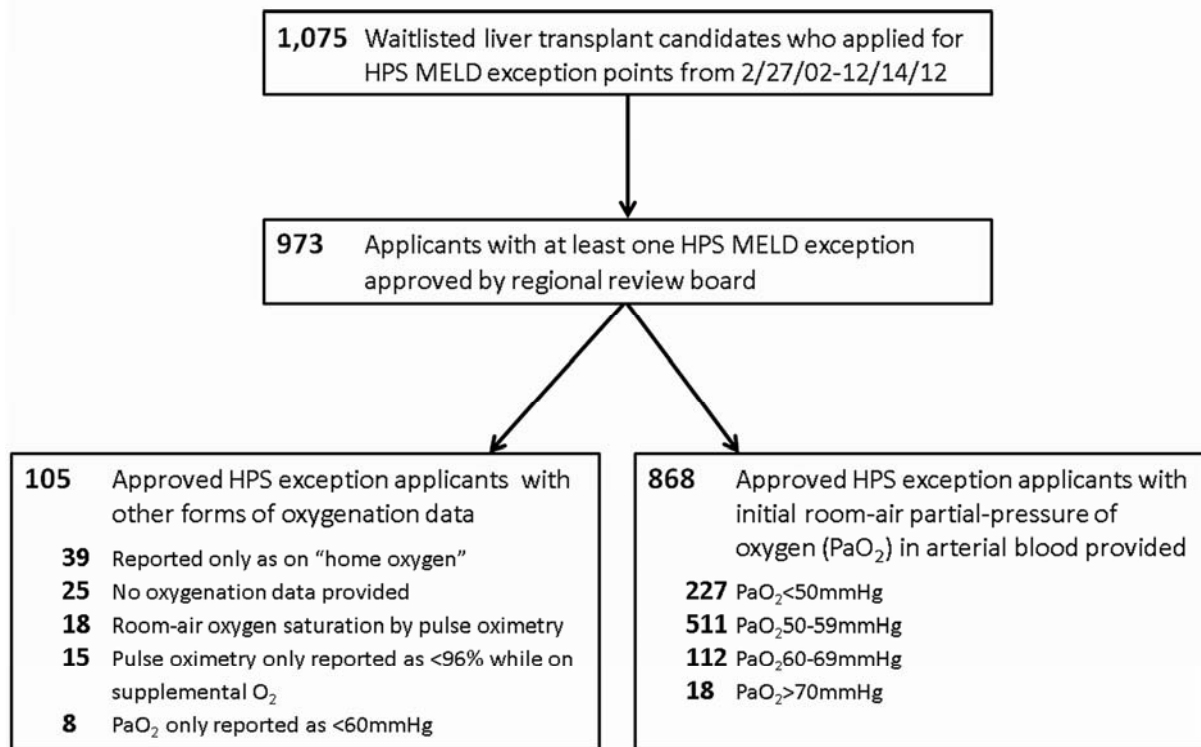

Supplement: NIHMS554705-supplement-01.pdf [file NIHMS554705-supplement-01.pdf]
